# Supplementary material for: The Application and Limitation of Universal Chloroplast Markers in Discriminating East Asian Evergreen Oaks
Source: Front Plant Sci. 2018 May 8;9:569. doi: 10.3389/fpls.2018.00569 (PMC5952231; doi:10.3389/fpls.2018.00569)
Supplement: Supplementary file 1 [file Table_1.xls]

## Sheet: Table S1
Table S1 Detailed information of samples used in this study
number	species.name	Section	Locality	Longititude	Latitude	Herbarium	Source
DM3704	Quercus acuta	Cyclobalanopsis	Kew garden (originated from Kyoto, Japan)	135.759	35.0106	CSH	Original
DM3705	Quercus acuta	Cyclobalanopsis	Kew garden (originated from Kyoto, Japan)	135.759	35.0106	CSH	Original
DM14296	Quercus arbutifolia	Cyclobalanopsis	Guanjian Mountains Natural Reserve, Fogang, Guangdong, China, China	113.525	23.964	CSH	Original
DM14297	Quercus arbutifolia	Cyclobalanopsis	Guanjian Mountains Natural Reserve, Fogang, Guangdong, China, China	113.525	23.964	CSH	Original
DM14298	Quercus arbutifolia	Cyclobalanopsis	Guanjian Mountains Natural Reserve, Fogang, Guangdong, China, China	113.525	23.964	CSH	Original
DM15140	Quercus arbutifolia	Cyclobalanopsis	Tongguzhang Mountain Natural Reserve, Shun, Guangdong, China, China	116.348	24.1857	CSH	Original
DM15141	Quercus arbutifolia	Cyclobalanopsis	Tongguzhang Mountain Natural Reserve, Shun, Guangdong, China, China	116.348	24.1857	CSH	Original
DM15142	Quercus arbutifolia	Cyclobalanopsis	Tongguzhang Mountain Natural Reserve, Shun, Guangdong, China, China	116.348	24.1848	CSH	Original
DM15144	Quercus arbutifolia	Cyclobalanopsis	Tongguzhang Mountain Natural Reserve, Shun, Guangdong, China, China	116.348	24.1843	CSH	Original
DM4075	Quercus arbutifolia	Cyclobalanopsis	Daqin Mountains, Zhangzhou, Fujian, China, China	117.114	24.2077	CSH	Original
DM4078	Quercus arbutifolia	Cyclobalanopsis	Daqin Mountains, Zhangzhou, Fujian, China, China	117.114	24.2077	CSH	Original
DM4079	Quercus arbutifolia	Cyclobalanopsis	Daqin Mountains, Zhangzhou, Fujian, China, China	117.114	24.2077	CSH	Original
DM4136	Quercus arbutifolia	Cyclobalanopsis	Daming Moutains, Wuming, Guangxi, China, China	108.441	23.4765	CSH	Original
DM5815	Quercus augustinii	Cyclobalanopsis	Dawei Mountains Natural Reserve, Piangbian, Yunnan, China, China	101.826	23.6632	CSH	Original
DM5818	Quercus augustinii	Cyclobalanopsis	Dawei Mountains Natural Reserve, Piangbian, Yunnan, China, China	103.7	22.9104	CSH	Original
DM5819	Quercus augustinii	Cyclobalanopsis	Dawei Mountains Natural Reserve, Piangbian, Yunnan, China, China	103.7	22.9104	CSH	Original
DM9110	Quercus augustinii	Cyclobalanopsis	Linxiang, Lincang, Yunnan, China, China	100.118	23.5656	CSH	Original
DM9111	Quercus augustinii	Cyclobalanopsis	Linxiang, Lincang, Yunnan, China, China	100.118	23.5656	CSH	Original
DM9112	Quercus augustinii	Cyclobalanopsis	Linxiang, Lincang, Yunnan, China, China	100.118	23.5656	CSH	Original
DM4196	Quercus bella	Cyclobalanopsis	Dayao Mountains, Laibin, Guangxi, China, China	110.079	23.8931	CSH	Original
DM4197	Quercus bella	Cyclobalanopsis	Dayao Mountains, Laibin, Guangxi, China, China	110.079	23.8915	CSH	Original
DM4192	Quercus blakei	Cyclobalanopsis	Dayao Mountains, Laibin, Guangxi, China, China	110.078	23.8924	CSH	Original
DM4194	Quercus blakei	Cyclobalanopsis	Dayao Mountains, Laibin, Guangxi, China, China	110.079	23.8926	CSH	Original
DM4195	Quercus blakei	Cyclobalanopsis	Dayao Mountains, Laibin, Guangxi, China, China	110.079	23.8926	CSH	Original
DM6704	Quercus blakei	Cyclobalanopsis	Tam Dao, slope to the tower of Tam Dao villeage, Vietnam	105.646	21.4639	CSH	Original
DM10480	Quercus championii	Cyclobalanopsis	Daming Moutains, Wuming, Guangxi, China, China	108.399	23.5156	CSH	Original
DM10481	Quercus championii	Cyclobalanopsis	Daming Moutains, Wuming, Guangxi, China, China	108.399	23.5156	CSH	Original
DM10717	Quercus championii	Cyclobalanopsis	Wuzhi Mountains, Qiongzhong, Hainan, China	109.682	18.906	CSH	Original
DM10719	Quercus championii	Cyclobalanopsis	Wuzhi Mountains, Qiongzhong, Hainan, China	109.682	18.906	CSH	Original
DM10835	Quercus championii	Cyclobalanopsis	Bawangling Mountains, Jiangchang, Hainan, China	109.195	19.0878	CSH	Original
DM10836	Quercus championii	Cyclobalanopsis	Bawangling Mountains, Jiangchang, Hainan, China	109.195	19.0878	CSH	Original
DM10837	Quercus championii	Cyclobalanopsis	Bawangling Mountains, Jiangchang, Hainan, China	109.195	19.0878	CSH	Original
DM8389	Quercus championii	Cyclobalanopsis	Qiniang Mountains, Shenzhen, Guangdong, China	114.541	22.5247	CSH	Original
DM8390	Quercus championii	Cyclobalanopsis	Qiniang Mountains, Shenzhen, Guangdong, China	114.541	22.5247	CSH	Original
DM8391	Quercus championii	Cyclobalanopsis	Qiniang Mountains, Shenzhen, Guangdong, China	114.541	22.5247	CSH	Original
DM4567	Quercus chapensis	Cyclobalanopsis	Menghai, Yunnan, China	100.336	21.573	CSH	Original
DM4571	Quercus chapensis	Cyclobalanopsis	Menghai, Yunnan, China	100.302	21.5732	CSH	Original
DM4574	Quercus chapensis	Cyclobalanopsis	Menghai, Yunnan, China	100.274	21.5847	CSH	Original
DM6048	Quercus chapensis	Cyclobalanopsis	Xianheping national forest park, Anlong, Guizhou, China	105.605	24.9776	CSH	Original
DM6049	Quercus chapensis	Cyclobalanopsis	Xianheping national forest park, Anlong, Guizhou, China	105.605	24.9776	CSH	Original
DM9360	Quercus chapensis	Cyclobalanopsis	Cangyuan, Lincang, Yunnan, China	99.1866	23.2649	CSH	Original
DM9361	Quercus chapensis	Cyclobalanopsis	Cangyuan, Lincang, Yunnan, China	99.1866	23.2649	CSH	Original
DM9362	Quercus chapensis	Cyclobalanopsis	Cangyuan, Lincang, Yunnan, China	99.1866	23.2649	CSH	Original
DM4121	Quercus daimingshanensis	Cyclobalanopsis	Daming Moutains, Wuming, Guangxi, China	108.435	23.5006	CSH	Original
DM4123	Quercus daimingshanensis	Cyclobalanopsis	Daming Moutains, Wuming, Guangxi, China	108.435	23.5006	CSH	Original
DM4156	Quercus daimingshanensis	Cyclobalanopsis	Jiangchang, Hainan, China	109.077	19.1238	CSH	Original
DM6445	Quercus delavayi	Cyclobalanopsis	The road from Eryuan to Liantie Village, Yunan	99.8997	26.0321	CSH	Original
DM6446	Quercus delavayi	Cyclobalanopsis	The road from Eryuan to Liantie Village, Yunan	99.8997	26.0321	CSH	Original
DM6447	Quercus delavayi	Cyclobalanopsis	The road from Eryuan to Liantie Village, Yunan	99.8997	26.0321	CSH	Original
DM6950	Quercus delavayi	Cyclobalanopsis	Wuding, Yunnan, China	102.372	25.5344	CSH	Original
DM6951	Quercus delavayi	Cyclobalanopsis	Wuding, Yunnan, China	102.372	25.5344	CSH	Original
DM6952	Quercus delavayi	Cyclobalanopsis	Wuding, Yunnan, China	102.372	25.5344	CSH	Original
DM9787	Quercus delavayi	Cyclobalanopsis	Nanjian, Yunnan, China	100.477	24.9825	CSH	Original
DM9788	Quercus delavayi	Cyclobalanopsis	Nanjian, Yunnan, China	100.477	24.9825	CSH	Original
KU382355	Quercus edithiae	Cyclobalanopsis	Unknown	NA	NA	NA	Genbank
DM10872	Quercus fleuryi	Cyclobalanopsis	Wuzhi Mountains, Qiongzhong, Hainan, China	109.695	18.8963	CSH	Original
DM10884	Quercus fleuryi	Cyclobalanopsis	Wuzhi Mountains, Qiongzhong, Hainan, China	109.695	18.8963	CSH	Original
DM3838	Quercus fleuryi	Cyclobalanopsis	Efengzhang, Yangchun, Guangdong, China	111.524	21.9171	CSH	Original
DM4089	Quercus fleuryi	Cyclobalanopsis	Efengzhang, Yangchun, Guangdong, China	111.524	21.9171	CSH	Original
DM12927	Quercus gilva	Cyclobalanopsis	Tiantong Temple, Ningbo, Zhejiang, China	121.793	29.8058	CSH	Original
DM12928	Quercus gilva	Cyclobalanopsis	Tiantong Temple, Ningbo, Zhejiang, China	121.791	29.8115	CSH	Original
DM12929	Quercus gilva	Cyclobalanopsis	Tiantong Temple, Ningbo, Zhejiang, China	121.793	29.8107	CSH	Original
DM3660	Quercus gilva	Cyclobalanopsis	Kew garden (originated from Osaka, Japan)	135.502	34.6937	CSH	Original
DM3739	Quercus gilva	Cyclobalanopsis	Kew garden (originated from Kyoto, Japan	135.759	35.0106	CSH	Original
DM8301	Quercus gilva	Cyclobalanopsis	Manabang Mountains, Miaoli, Taiwan	120.902	24.366	CSH	Original
DM8341	Quercus gilva	Cyclobalanopsis	Chike Mountains, Hualian, Taiwan	121.39	23.3798	CSH	Original
DM3549	Quercus ciliaris	Cyclobalanopsis	Kunming Institute of Botany, China (originated from Wuyi Mountains, Fujian, China)	117.961	27.65	CSH	Original
DM3551	Quercus ciliaris	Cyclobalanopsis	Kunming Institute of Botany, China (originated from Wuyi Mountains, Fujian, China)	117.961	27.65	CSH	Original
DM3638	Quercus ciliaris	Cyclobalanopsis	Kew garden (originated from Shennongjia, Hubei, China)	110.68	31.7435	CSH	Original
DM3639	Quercus ciliaris	Cyclobalanopsis	Kew garden (originated from Shennongjia, Hubei, China)	110.68	31.7435	CSH	Original
DM3718	Quercus ciliaris	Cyclobalanopsis	Kew garden (originated from Shennongjia, Hubei, China)	110.68	31.7435	CSH	Original
DM5020	Quercus ciliaris	Cyclobalanopsis	Maolan National Nature Reserve, Libo, Guizhou, China	107.944	25.2879	CSH	Original
DM5030	Quercus ciliaris	Cyclobalanopsis	Maolan National Nature Reserve, Libo, Guizhou, China	107.944	25.2879	CSH	Original
DM5033	Quercus ciliaris	Cyclobalanopsis	Maolan National Nature Reserve, Libo, Guizhou, China	107.944	25.2879	CSH	Original
DM7153	Quercus ciliaris	Cyclobalanopsis	Tianmu Mountains, Lin'an, Zhejiang, China	119.455	30.318	CSH	Original
DM7154	Quercus ciliaris	Cyclobalanopsis	Tianmu Mountains, Lin'an, Zhejiang, China	119.455	30.318	CSH	Original
DM7155	Quercus ciliaris	Cyclobalanopsis	Tianmu Mountains, Lin'an, Zhejiang, China	119.455	30.318	CSH	Original
DM7670	Quercus kerrii	Cyclobalanopsis	Xinping, Yunnan, China	101.852	24.026	CSH	Original
DM7671	Quercus kerrii	Cyclobalanopsis	Xinping, Yunnan, China	101.852	24.026	CSH	Original
DM8640	Quercus kerrii	Cyclobalanopsis	Ximeng, Yunnan, China	99.6089	22.8061	CSH	Original
DM8641	Quercus kerrii	Cyclobalanopsis	Ximeng, Yunnan, China	99.6089	22.8061	CSH	Original
DM8642	Quercus kerrii	Cyclobalanopsis	Ximeng, Yunnan, China	99.6089	22.8061	CSH	Original
DM9194	Quercus kerrii	Cyclobalanopsis	Lincang, Yunnan, China	100.261	23.823	CSH	Original
DM9195	Quercus kerrii	Cyclobalanopsis	Lincang, Yunnan, China	100.261	23.823	CSH	Original
DM10551	Quercus kouangsiensis	Cyclobalanopsis	Fangchenggang, Guangxi, China	107.909	21.9092	CSH	Original
DM4315	Quercus kouangsiensis	Cyclobalanopsis	Diaoluo Mountains National Natural Reserve, Hainan, China	109.883	18.7169	CSH	Original
DM13240	Quercus lamellosa	Cyclobalanopsis	Gongshan, Yunnan, China	98.4096	27.9077	CSH	Original
DM13244	Quercus lamellosa	Cyclobalanopsis	Gongshan, Yunnan, China	98.4096	27.9077	CSH	Original
DM3712	Quercus lamellosa	Cyclobalanopsis	Kew garden (originated from Nepal)	84.1257	28.3693	CSH	Original
DM3736	Quercus lamellosa	Cyclobalanopsis	Kew garden (originated from Nepal)	84.1257	28.3693	CSH	Original
DM9585	Quercus lamellosa	Cyclobalanopsis	Daniang Mountains, Yingjiang, Yunnan, China	98.0158	25.2526	CSH	Original
DM9587	Quercus lamellosa	Cyclobalanopsis	Daniang Mountains, Yingjiang, Yunnan, China	98.0158	25.2526	CSH	Original
DM5816	Quercus langbianensis	Cyclobalanopsis	Dawei Mountains Natural Reserve, Piangbian, Yunnan, China	103.7	22.9104	CSH	Original
DM5820	Quercus langbianensis	Cyclobalanopsis	Dawei Mountains Natural Reserve, Piangbian, Yunnan, China	103.7	22.9104	CSH	Original
DM3689	Quercus morii	Cyclobalanopsis	Kew garden (originated from Central Mountains, Taiwan )	120.893	23.1811	CSH	Original
DM3732	Quercus morii	Cyclobalanopsis	Kew garden (originated from Central Mountains, Taiwan )	120.893	23.1811	CSH	Original
DM4033	Quercus hypargyrea	Cyclobalanopsis	Meihua Mountains Natural Reserve, Fujian, China	116.845	25.341	CSH	Original
DM4034	Quercus hypargyrea	Cyclobalanopsis	Meihua Mountains Natural Reserve, Fujian, China	116.845	25.341	CSH	Original
DM4035	Quercus hypargyrea	Cyclobalanopsis	Meihua Mountains Natural Reserve, Fujian, China	116.845	25.341	CSH	Original
DM6046	Quercus hypargyrea	Cyclobalanopsis	Xianheping national forest park, Anlong, Guizhou, China	105.606	24.9761	CSH	Original
DM6047	Quercus hypargyrea	Cyclobalanopsis	Xianheping national forest park, Anlong, Guizhou, China	105.606	24.9761	CSH	Original
DM3701	Quercus myrsinifolia	Cyclobalanopsis	Kew garden (originated from Japan, Nagasaki)	129.878	32.7503	CSH	Original
DM4169-1	Quercus myrsinifolia	Cyclobalanopsis	Jiangchang, Hainan, China	109.199	19.1424	CSH	Original
DM4171-1	Quercus myrsinifolia	Cyclobalanopsis	Jiangchang, Hainan, China	109.189	19.1397	CSH	Original
DM4178-1	Quercus myrsinifolia	Cyclobalanopsis	Jiangchang, Hainan, China	109.078	19.1238	CSH	Original
DM10560	Quercus oxyodon	Cyclobalanopsis	Yunlong, Yunnan, China	99.3064	25.8641	CSH	Original
DM10561	Quercus oxyodon	Cyclobalanopsis	Yunlong, Yunnan, China	99.3064	25.8641	CSH	Original
DM10562	Quercus oxyodon	Cyclobalanopsis	Yunlong, Yunnan, China	99.3064	25.8641	CSH	Original
DM3610	Quercus oxyodon	Cyclobalanopsis	Kew garden (originated from Nepal)	84.1257	28.3693	CSH	Original
DM3656	Quercus oxyodon	Cyclobalanopsis	Kew garden (originated from Nepal)	84.1257	28.3693	CSH	Original
DM5875	Quercus oxyodon	Cyclobalanopsis	Shuishaba, Malipo, Yunnan, China, China	104.83	23.1475	CSH	Original
DM5876	Quercus oxyodon	Cyclobalanopsis	Shuishaba, Malipo, Yunnan, China, China	104.83	23.1475	CSH	Original
DM5877	Quercus oxyodon	Cyclobalanopsis	Shuishaba, Malipo, Yunnan, China, China	104.83	23.1475	CSH	Original
DM11428	Quercus pachyloma	Cyclobalanopsis	Yongquan Temple, Fuzhou, Fujian, China	119.392	26.0582	CSH	Original
DM11429	Quercus pachyloma	Cyclobalanopsis	Yongquan Temple, Fuzhou, Fujian, China	119.392	26.0582	CSH	Original
DM11430	Quercus pachyloma	Cyclobalanopsis	Yongquan Temple, Fuzhou, Fujian, China	119.392	26.0582	CSH	Original
DM2084_1	Quercus pachyloma	Cyclobalanopsis	Fenghuang Mountains, Jieyang, Guangdong, China	116.143	23.4417	CSH	Original
DM2084_3	Quercus pachyloma	Cyclobalanopsis	Fenghuang Mountains, Jieyang, Guangdong, China	116.143	23.4417	CSH	Original
DM10900	Quercus patelliformis	Cyclobalanopsis	Wuzhi Mountains, Qiongzhong, Hainan, China	109.695	18.8963	CSH	Original
DM4249	Quercus patelliformis	Cyclobalanopsis	Bawangling Mountains, Jiangchang, Hainan, China	109.187	19.1088	CSH	Original
DM4263	Quercus patelliformis	Cyclobalanopsis	Bawangling Mountains, Jiangchang, Hainan, China	109.191	19.1209	CSH	Original
DM4277	Quercus patelliformis	Cyclobalanopsis	Bawangling Mountains, Jiangchang, Hainan, China	109.106	19.0244	CSH	Original
DM4323	Quercus patelliformis	Cyclobalanopsis	Diaoluo Mountains National Natural Reserve, Hainan, China	109.846	18.701	CSH	Original
DM5800	Quercus rex	Cyclobalanopsi	Puer, Yunnan, China	101.07	22.5987	CSH	Original
DM5798	Quercus rex	Cyclobalanopsi	Puer, Yunnan, China	101.11	22.5957	CSH	Original
DM5801	Quercus rex	Cyclobalanopsi	Puer, Yunnan, China	101.07	22.5987	CSH	Original
DM5802	Quercus rex	Cyclobalanopsi	Puer, Yunnan, China	101.07	22.5987	CSH	Original
DM3700	Quercus salicina	Cyclobalanopsis	Kew garden (originated from Japan, Nagasaki)	129.878	32.7503	CSH	Original
DM6494	Quercus schottkyana	Cyclobalanopsis	Shuangbai, Yunnan, China	101.877	24.34	CSH	Original
DM6495	Quercus schottkyana	Cyclobalanopsis	Shuangbai, Yunnan, China	101.877	24.34	CSH	Original
DM6496	Quercus schottkyana	Cyclobalanopsis	Shuangbai, Yunnan, China	101.877	24.34	CSH	Original
DM8200	Quercus schottkyana	Cyclobalanopsis	The way from Moxi to Shimian, Sichuan, China, China	102.093	29.466	CSH	Original
DM8201	Quercus schottkyana	Cyclobalanopsis	The way from Moxi to Shimian, Sichuan, China, China	102.093	29.466	CSH	Original
DL253_4	Quercus sessilifolia	Cyclobalanopsis	Shanghang, Fujian, China	116.881	25.3069	CSH	Original
DL253_5	Quercus sessilifolia	Cyclobalanopsis	Shanghang, Fujian, China	116.881	25.3069	CSH	Original
DL263_1	Quercus sessilifolia	Cyclobalanopsis	Tianbaoyan, Yong'an, Fujian, China	117.565	25.9227	CSH	Original
DL281_1	Quercus sessilifolia	Cyclobalanopsis	Wuyi Mountains, Fujian, China	117.688	27.7537	CSH	Original
DL281_2	Quercus sessilifolia	Cyclobalanopsis	Wuyi Mountains, Fujian, China	117.688	27.7537	CSH	Original
DM3687	Quercus salicina	Cyclobalanopsis	Kew garden (Originated from Taiwan, Central Mt.)	120.892	23.1811	CSH	Original
DM3777	Quercus stewardiana	Cyclobalanopsis	Maoer Mountains, Guilin, Guangxi, China	110.411	25.8072	CSH	Original
DM3778	Quercus stewardiana	Cyclobalanopsis	Maoer Mountains, Guilin, Guangxi, China	110.411	25.8072	CSH	Original
DM3779	Quercus stewardiana	Cyclobalanopsis	Maoer Mountains, Guilin, Guangxi, China	110.411	25.8072	CSH	Original
DM3902	Quercus stewardiana	Cyclobalanopsis	Baishanzu National Natural Reserves, Lishui, Zhejiang, China	119.189	27.747	CSH	Original
DM3907	Quercus stewardiana	Cyclobalanopsis	Baishanzu National Natural Reserves, Lishui, Zhejiang, China	119.189	27.747	CSH	Original
DM3910	Quercus stewardiana	Cyclobalanopsis	Baishanzu National Natural Reserves, Lishui, Zhejiang, China	119.189	27.747	CSH	Original
DM7900	Quercus stewardiana	Cyclobalanopsis	Mangdang Mountains, Nanping, Fujian, China	118.15	27.15	CSH	Original
DM7909	Quercus stewardiana	Cyclobalanopsis	Mangdang Mountains, Nanping, Fujian, China	118.15	27.15	CSH	Original
DM7911	Quercus stewardiana	Cyclobalanopsis	Mangdang Mountains, Nanping, Fujian, China	118.15	27.15	CSH	Original
DM3696	Lithocarpus henryi	Lithocarpus	Kew garden (originated from Japan, Kyoto)	135.759	35.0106	CSH	Original
DM3717	Quercus acherdophylla	Lobatae	Kew garden (originated from from Central Mexico)	-120.892	23.1811	CSH	Original
DM5906	Quercus acrodonta	Ilex	Tuguozhai, Yanshan, Yunnan, China	104.351	23.5512	CSH	Original
DM5907	Quercus acrodonta	Ilex	Tuguozhai, Yanshan, Yunnan, China	104.351	23.5512	CSH	Original
DM5908	Quercus acrodonta	Ilex	Tuguozhai, Yanshan, Yunnan, China	104.351	23.5512	CSH	Original
DM7357	Quercus acrodonta	Ilex	Baotianman, Nanyang, Henan, China	111.963	33.517	CSH	Original
DM7358	Quercus acrodonta	Ilex	Baotianman, Nanyang, Henan, China	111.963	33.517	CSH	Original
DM7359	Quercus acrodonta	Ilex	Baotianman, Nanyang, Henan, China	111.963	33.517	CSH	Original
DM17000	Quercus acutissima	Cerris	Shanghai Chenshan Botanic Garden, China	121.184	31.0824	CSH	Original
DM8764	Quercus acutissima	Cerris	Menglian, Puer, Yunnan, China	99.6292	22.2572	CSH	Original
DM8765	Quercus acutissima	Cerris	Menglian, Puer, Yunnan, China	99.6292	22.2572	CSH	Original
DM8953	Quercus acutissima	Cerris	Shuangjiang, Yunnan, China	99.8617	23.5146	CSH	Original
DM8954	Quercus acutissima	Cerris	Shuangjiang, Yunnan, China	99.8617	23.5146	CSH	Original
DM8958	Quercus acutissima	Cerris	Shuangjiang, Yunnan, China	99.8617	23.5146	CSH	Original
DM9346	Quercus acutissima	Cerris	Gengma, Yunnan, China	99.364	23.4383	CSH	Original
DM3654	Quercus agrifolia var oxyadenia	Lobatae	Kew garden (originated from California, USA)	-119.434	36.7675	CSH	Original
DM13853	Quercus aliena	Quercus	Starhill Forest Arboretum, IL	89.8028	39.9359	CSH	Original
KP301144	Quercus aliena	Quercus	China	NA	NA	Beijing Forestry University	Genbank
KU240007	Quercus aliena	Quercus	Xi’an, Shaanxi, China	108.94	34.3416	Herbarium of Northwest University	Genbank
NC_026790	Quercus aliena	Quercus	China	NA	NA	Beijing Forestry University	Genbank
DM12857	Quercus alnifolia	Ilex	Cyprus	32.8408	34.9059	CSH	Original
DM13626	Quercus alnifolia	Ilex	Arboretum de La Bergerette, France (originated from Troodos mountains, Cyprus)	32.8794	34.922	CSH	Original
DM6569	Quercus alnifolia	Ilex	Arboretum des Pouyouleix, France (originated from Cyprus)	32.9117	34.988	CSH	Original
DM12284	Quercus aquifolioides	Ilex	Napahai, Shangri-La, Yunnan, China	99.6164	27.9284	CSH	Original
DM12286	Quercus aquifolioides	Ilex	Napahai, Shangri-La, Yunnan, China	99.4836	28.0272	CSH	Original
DM12432	Quercus aquifolioides	Ilex	Changhaizi, Muli, Sichuan, China	101.389	28.5121	CSH	Original
KP340971	Quercus aquifolioides	Ilex	Unknown	NA	NA	Herbarium of Northwest University	Genbank
NC_026913	Quercus aquifolioides	Ilex	Unknown	NA	NA	Herbarium of Northwest University	Genbank
DM3652	Quercus arkansana	Lobatae	Kew garden (originated from USA)	NA	NA	CSH	Original
DM3658	Quercus arkansana	Lobatae	Kew garden (originated from USA)	NA	NA	CSH	Original
DM13629	Quercus baloot	Ilex	Arboretum de La Bergerette, France (originated from Pakistan)	72.7141	34.647	CSH	Original
DM13630	Quercus baloot	Ilex	Arboretum de La Bergerette, France (originated from Pakistan)	73.1976	35.2116	CSH	Original
DM3688	Quercus baronii	Ilex	Kew garden (originated from Foping, Shaanxi, China)	108.491	33.9086	CSH	Original
KT963087	Quercus baronii	Ilex	Meixian, Shaanxi	107.75	34.15	Herbarium of Northwest University	Genbank
NC_029490	Quercus baronii	Ilex	Meixian, Shaanxi	107.75	34.15	Herbarium of Northwest University	Genbank
DM3148	Quercus bawanglingensis	Ilex	Exianling, Changjiang, Hainan, China	109.116	19.0114	CSH	Original
DM3151	Quercus bawanglingensis	Ilex	Exianling, Changjiang, Hainan, China	109.116	19.0118	CSH	Original
DM3152	Quercus bawanglingensis	Ilex	Exianling, Changjiang, Hainan, China	109.116	19.0118	CSH	Original
DM3675	Quercus infectoria subsp. veneris	Quercus	Kew garden (originated from Sicily)	37.638	13.9306	CSH	Original
DM7038	Quercus chenii	Cerris	Taoling, Jinzhai, Anhui	115.755	31.599	CSH	Original
DM3655	Quercus chrysolepis	Protobalanus	Kew garden (originated from Oregon, USA)	-120.554	43.8041	CSH	Original
DM12860	Quercus coccifera	Ilex	South France	3.43068	44.0605	CSH	Original
DM6576	Quercus coccifera	Ilex	Arboretum des Pouyouleix, France (originated from Turkey)	29.9165	38.3094	CSH	Original
DM6938	Quercus coccifera	Ilex	sd Snyers 06100404, Road, agios lsidoros, Rhodes, Greece	26.3912	38.9685	CSH	Original
DM12341	Quercus cocciferoides	Ilex	Deqin, Yunnan, China	98.9143	28.0472	CSH	Original
DM12343	Quercus cocciferoides	Ilex	Deqin, Yunnan, China	98.9143	28.0472	CSH	Original
DM12344	Quercus cocciferoides	Ilex	Deqin, Yunnan, China	98.9143	28.0472	CSH	Original
DM12402	Quercus cocciferoides	Ilex	Binchuan, Yunnan, China	100.346	25.7995	CSH	Original
DM13612	Quercus cocciferoides	Ilex	Panzhihua, Sichuan, China	101.728	26.6512	CSH	Original
DM13613	Quercus cocciferoides	Ilex	Panzhihua, Sichuan, China	101.728	26.6512	CSH	Original
DM6461	Quercus cocciferoides	Ilex	Xinping, Yuxi, Yunnan, China	101.512	24.177	CSH	Original
DM6463	Quercus cocciferoides	Ilex	Xinping, Yuxi, Yunnan, China	101.512	24.177	CSH	Original
DM13121	Quercus coccinea	Lobatae	the Arnold Arboretum, Boston, USA	-71.1208	42.3074	CSH	Original
DM13124	Quercus coccinea	Lobatae	the Arnold Arboretum, Boston, USA	-71.1208	42.3074	CSH	Original
DM3659	Quercus cornelius-mulleri	Quercus	Kew garden (originated from Oregon, USA)	-120.554	43.8041	CSH	Original
DM6509	Quercus dolicholepis	Ilex	Yiman, Yunnan, China, China	102.102	24.697	CSH	Original
KU240010	Quercus dolicholepis	Ilex	Yichang, Hubei, China	111.299	30.7047	Herbarium of Northwest University	Genbank
NC_031357	Quercus dolicholepis	Ilex	Yichang, Hubei, China	111.299	30.7047	Herbarium of Northwest University	Genbank
DL264	Quercus engleriana	Ilex	Tianbaoyan, Yong'an, Fujian, China	117.565	25.9227	CSH	Original
DM7382	Quercus engleriana	Ilex	Jinfo Mountains, Chongqing, China	107.186	29.0351	CSH	Original
DM7383	Quercus engleriana	Ilex	Jinfo Mountains, Chongqing, China	107.186	29.0351	CSH	Original
DM7384	Quercus engleriana	Ilex	Jinfo Mountains, Chongqing, China	107.186	29.0351	CSH	Original
DM13628	Quercus floribunda	Ilex	Arboretum de La Bergerette, France (originated from Swat valley, Pakistan)	72.5796	35.4882	CSH	Original
DM10666	Quercus franchetii	Ilex	Binchuan, Yunnan, China, China	100.373	25.8191	CSH	Original
DM10667	Quercus franchetii	Ilex	Binchuan, Yunnan, China, China	100.373	25.8191	CSH	Original
DM9187	Quercus franchetii	Ilex	Linchuan, Yunnan, China, China	100.156	23.5328	CSH	Original
DM9188	Quercus franchetii	Ilex	Linchuan, Yunnan, China, China	100.156	23.5328	CSH	Original
DM9781	Quercus franchetii	Ilex	Midu, Yunan, China	100.597	25.1396	CSH	Original
DM9782	Quercus franchetii	Ilex	Midu, Yunan, China	100.597	25.1396	CSH	Original
DM9783	Quercus franchetii	Ilex	Midu, Yunan, China	100.597	25.1396	CSH	Original
DM3666	Quercus greggii	Quercus	Kew garden (originated from Mexico)	-102.553	23.6345	CSH	Original
DM6572	Quercus ilex	Ilex	Arboretum des Pouyouleix, France (originated form Aradon, Bretagne,France)	2.81299	47.6264	CSH	Original
DM6573	Quercus ilex	Ilex	Arboretum des Pouyouleix, France	0.888261	45.4736	CSH	Original
DM6904	Quercus ilex	Ilex	Azerbaijan	49.8342	40.4521	CSH	Original
DM3640	Quercus infectoria	Quercus	Kew garden (originated from Greece)	21.8243	39.0742	CSH	Original
DM11859	Quercus kingiana	Ilex	Puer, Yunnan, China, China	100.588	22.747	CSH	Original
DM11860	Quercus kingiana	Ilex	Puer, Yunnan, China, China	100.588	22.747	CSH	Original
DM8830	Quercus kingiana	Ilex	Lancang, Yunnan, China, China	100.139	22.6555	CSH	Original
DM8831	Quercus kingiana	Ilex	Lancang, Yunnan, China, China	100.133	22.6482	CSH	Original
DM8835	Quercus kingiana	Ilex	Lancang, Yunnan, China, China	100.133	22.6482	CSH	Original
DM13627	Quercus leucotrichophora	Ilex	Arboretum de La Bergerette, France (Swat valley,Pakistan)	72.3443	34.663210,	CSH	Original
DM12263	Quercus longispica	Ilex	Jianchuan, Yunnan, China, China	99.953	26.4808	CSH	Original
DM12264	Quercus longispica	Ilex	Jianchuan, Yunnan, China, China	99.953	26.4808	CSH	Original
DM12265	Quercus longispica	Ilex	Jianchuan, Yunnan, China, China	99.953	26.4808	CSH	Original
DM12299	Quercus longispica	Ilex	Shangri-La, Yunnan, China, China	99.5761	27.9718	CSH	Original
DM12300	Quercus longispica	Ilex	Shangri-La, Yunnan, China, China	99.5761	27.9718	CSH	Original
DM12740	Quercus longispica	Ilex	Yuanmou, Yunnan, China, China	101.975	25.7415	CSH	Original
DM12741	Quercus longispica	Ilex	Yuanmou, Yunnan, China, China	101.975	25.7415	CSH	Original
DM3582	Quercus longispica	Ilex	Kunming, Yunnan, China, China	104.83	23.1475	CSH	Original
DM5879	Quercus marlipoensis	Ilex	Malipo, Yunnan, China, China	101.001	30.041	CSH	Original
DM12391	Quercus pannosa	Ilex	Binchuan, Yunnan, China, China	100.361	25.9698	CSH	Original
DM5332	Quercus pannosa	Ilex	Longzi, Tibet, China	93.4026	28.6058	CSH	Original
DM8175	Quercus pannosa	Ilex	Yajiang, Sichuan, China, China	101.001	30.041	CSH	Original
DM8176	Quercus pannosa	Ilex	Yajiang, Sichuan, China, China	101.001	30.041	CSH	Original
DM8179	Quercus pannosa	Ilex	Yajiang, Sichuan, China, China	101.001	30.041	CSH	Original
DM8181	Quercus pannosa	Ilex	Yajiang, Sichuan, China, China	101.001	30.041	CSH	Original
DM7882	Quercus phillyreoides	Ilex	Yandang Mountains, Nanping, Fujian, China, China	118.15	27.15	CSH	Original
DM7883	Quercus phillyreoides	Ilex	Yandang Mountains, Nanping, Fujian, China, China	118.15	27.15	CSH	Original
DM7885	Quercus phillyreoides	Ilex	Yandang Mountains, Nanping, Fujian, China, China	118.15	27.15	CSH	Original
DM11089	Quercus phillyreoides	Ilex	Jianou, Fujian, China, China	118.820136‎	27.2252	CSH	Original
DM11090	Quercus phillyreoides	Ilex	Jianou, Fujian, China, China	118.820136‎	27.2252	CSH	Original
DM11272	Quercus phillyreoides	Ilex	Yunzhong Moutains, Anxi, Fujian, China, China	117.666	25.3029	CSH	Original
DM11273	Quercus phillyreoides	Ilex	Yunzhong Moutains, Anxi, Fujian, China, China	117.666	25.3029	CSH	Original
DM11274	Quercus phillyreoides	Ilex	Yunzhong Moutains, Anxi, Fujian, China, China	117.666	25.3029	CSH	Original
DM12995	Quercus phillyreoides	Ilex	Taizhou, Zhejiang, China, China	120.579	28.56	CSH	Original
DM12996	Quercus phillyreoides	Ilex	Taizhou, Zhejiang, China, China	120.579	28.56	CSH	Original
DM10583	Quercus rehderiana	Ilex	Yunlong, Yunnan, China, China	99.3064	25.8641	CSH	Original
DM10584	Quercus rehderiana	Ilex	Yunlong, Yunnan, China, China	99.3064	25.8641	CSH	Original
DM10585	Quercus rehderiana	Ilex	Yunlong, Yunnan, China, China	99.3064	25.8641	CSH	Original
DM10643	Quercus rehderiana	Ilex	Jianchuan, Yunnan, China, China	99.7396	26.535	CSH	Original
DM10644	Quercus rehderiana	Ilex	Jianchuan, Yunnan, China, China	99.7396	26.535	CSH	Original
DM10645	Quercus rehderiana	Ilex	Jianchuan, Yunnan, China, China	99.7396	26.535	CSH	Original
DM5978	Quercus rehderiana	Ilex	Jizu Moutains, Binchuan, Yunnan, China, China	100.399	25.963	CSH	Original
DM5979	Quercus rehderiana	Ilex	Jizu Moutains, Binchuan, Yunnan, China, China	100.399	25.963	CSH	Original
DM5980	Quercus rehderiana	Ilex	Jizu Moutains, Binchuan, Yunnan, China, China	100.399	25.963	CSH	Original
DM3680	Quercus rugosa	Quercus	Kew garden (originated from the Santa Rita Mountains, SE of Tucson, Arizona, USA)	-110.775	31.8259	CSH	Original
JX970937	Quercus rubra	Lobatae	Cherokee National Forest Watauga northern red oak seed orchard in Unicoi, TN, USA	-82.05	36.55	NA	Genbank
NC_020152	Quercus rubra	Lobatae	Cherokee National Forest Watauga northern red oak seed orchard in Unicoi, TN, USA	-82.05	36.55	NA	Genbank
DM6525	Quercus senescens	Ilex	Kunming, Yunnan, China, China	102.102	24.6965	CSH	Original
DM6526	Quercus senescens	Ilex	Kunming, Yunnan, China, China	102.102	24.6965	CSH	Original
DM6527	Quercus senescens	Ilex	Kunming, Yunnan, China, China	102.102	24.6965	CSH	Original
DM8259	Quercus senescens	Ilex	Yunlong, Yunnan, China, China	99.3281	25.8597	CSH	Original
DM8260	Quercus senescens	Ilex	Yunlong, Yunnan, China, China	99.3281	25.8597	CSH	Original
DM8261	Quercus senescens	Ilex	Yunlong, Yunnan, China, China	99.3281	25.8597	CSH	Original
DM3554	Quercus senescens	Ilex	Kunming, Yunnan, China, China	102.761	25.3446	CSH	Original
DM3568	Quercus senescens	Ilex	Kunming, Yunnan, China, China	102.761	25.3446	CSH	Original
DM3570	Quercus senescens	Ilex	Kunming, Yunnan, China, China	102.761	25.3446	CSH	Original
DM6488	Quercus serrata	Quercus	The way from Shuangbai to Xinping, Yunnan, China, China	101.679	24.383	CSH	Original
DM4198	Quercus setulosa	Ilex	Dayao Mountains, Laibin, Guangxi, China, China	106.005	23.2464	CSH	Original
DM4200	Quercus setulosa	Ilex	Dayao Mountains, Laibin, Guangxi, China, China	106.005	23.2464	CSH	Original
DM4265	Quercus setulosa	Ilex	Bawangling Mountains, Jiangchang, Hainan, China, China	109.116	19.0118	CSH	Original
DM4271	Quercus setulosa	Ilex	Bawangling Mountains, Jiangchang, Hainan, China, China	109.116	19.0118	CSH	Original
DM8213	Quercus spinosa	Ilex	The way from Moxi to Shimian, Sichuan, China, China, China	102.217	29.446	CSH	Original
DM8331_2	Quercus spinosa	Ilex	Tailuge National Park, Taiwan	121.026	23.99	CSH	Original
DM8331_4	Quercus spinosa	Ilex	Tailuge National Park, Taiwan	121.026	23.99	CSH	Original
KM841421	Quercus spinosa	Ilex	Lijiang,Yunan, China	99.7157	27.254	Herbarium of Beijing Forestry University	Genbank
NC_026907	Quercus spinosa	Ilex	Lijiang,Yunan, China	99.7157	27.254	Herbarium of Beijing Forestry University	Genbank
DM3653	Quercus suber	Cerris	Kew garden (originated from SW. Turkey)	31.2963	37.7795	CSH	Original
DM8336	Quercus tarokoensis	Ilex	Tailuge National Park, Taiwan	121.519	24.1783	CSH	Original
DM8337	Quercus tarokoensis	Ilex	Tailuge National Park, Taiwan	121.519	24.1783	CSH	Original
DM8349	Quercus tarokoensis	Ilex	Hualian, Taiwan	121.296	23.1374	CSH	Original
DM8227	Quercus tatakaensis	Ilex	Chevithorne Barton Garden, UK (originated from Tailuge, Taiwan)	121.491	24.1939	CSH	Original
DM8229	Quercus tungmaiensis	Ilex	Chevithorne Barton Garden, UK (originated from Assam, Indian)	92.9313	26.1934	CSH	Original
DM5885	Quercus utilis	Ilex	Shuishaba, Malipo, Yunnan, China, China	104.831	23.16	CSH	Original
DM5886	Quercus utilis	Ilex	Shuishaba, Malipo, Yunnan, China, China	104.831	23.16	CSH	Original
DM5887	Quercus utilis	Ilex	Shuishaba, Malipo, Yunnan, China, China	104.831	23.16	CSH	Original
DM6113	Quercus utilis	Ilex	Maolan National Nature Reserve, Libo, Guizhou, China	107.944	25.2879	CSH	Original
DM6114	Quercus utilis	Ilex	Maolan National Nature Reserve, Libo, Guizhou, China	107.944	25.2879	CSH	Original
DM6115	Quercus utilis	Ilex	Maolan National Nature Reserve, Libo, Guizhou, China	107.944	25.2879	CSH	Original
DL422	Quercus utilis	Ilex	Malipo, Yunnan, China, China	102.102	24.6965	CSH	Original
DM7506	Quercus variabilis	Cerris	Yiman, Yunnan, China, China	102.167	24.8333	CSH	Original
DM7644	Quercus variabilis	Cerris	Xinping, Yunnan, China, China	101.987	23.9397	CSH	Original
DM7645	Quercus variabilis	Cerris	Xinping, Yunnan, China, China	101.987	23.9397	CSH	Original
DM7646	Quercus variabilis	Cerris	Xinping, Yunnan, China, China	101.987	23.9397	CSH	Original
DM9811	Quercus variabilis	Cerris	Yongping, Yunnan, China, China	99.9486	25.4834	CSH	Original
DM9812	Quercus variabilis	Cerris	Yongping, Yunnan, China, China	99.9486	25.4834	CSH	Original
DM9813	Quercus variabilis	Cerris	Yongping, Yunnan, China, China	99.9486	25.4834	CSH	Original
KU240009	Quercus variabilis	Cerris	Xi’an, Shaanxi,China	108.94	34.3416	herbarium of Herbarium of Northwest University	Genbank
NC_031356	Quercus variabilis	Cerris	Xi’an, Shaanxi,China	108.94	34.3416	herbarium of Herbarium of Northwest University	Genbank
DM5641	Quercus yiwuensis	Ilex	Mengla, Yunnan, China, China	101.428	21.9	CSH	Original
DM5642	Quercus yiwuensis	Ilex	Mengla, Yunnan, China, China	101.428	21.9	CSH	Original
DM5643	Quercus yiwuensis	Ilex	Mengla, Yunnan, China, China	101.428	21.9	CSH	Original
DM2040.24	Quercus yiwuensis	Ilex	Puer, Yunnan, China, China	100.686	22.9159	CSH	Original
DM4639	Quercus yiwuensis	Ilex	Menghai, Yunnan, China, China	100.759	22.3096	CSH	Original
Herbarium of the Shanghai Chenshan Botanical Garden (CSH)

## Sheet: Table S2
Table S2 Primer sequences of four cpDNA marker
Amplification region	Sequence（5′-3′）	Reference
atpI-atpH	F: ATAGGTGAATCCATGGAGGG	Grivet et al. (2001)
	R: CCAGCAGCAATAACGGAAGC
matK	F: TGCATTTATTGCGGTTCTTTC	CBOL (2009)
	R: CGCGTGCAGTACTTTTGTGT
psbA-trnH	F: GTTATGCATGAACGTAATGCTC	Shaw et al. (2005)
	R: CGCGCATGGTGGATTCACAAATC
ycf1	F:TCTCGACGAAAATCCGATTGTTGTGAAT	Dong et al. (2015)
	R: ATACATGTAAAAGTGATGGAAAA
Reference
CBOL, P.W.G., 2009. A DNA barcode for land plants. Proceedings of the National Academy of Sciences of the United States of America 106, 12794-12797.
Dong, W., Xu, C., Li, C., Sun, J., Zuo, Y., Shi, S., Cheng, T., Guo, J., Zhou, S., 2015. ycf1, the most promising plastid DNA barcode of land plants. Scientific Reports 5, 8348.
Grivet, D., Heinze, B., Vendramin, G., Petit, R., 2001. Genome walking with consensus primers: application to the large single copy region of chloroplast DNA. Molecular Ecology Notes 1, 345-349.
Shaw, J., Lickey, E.B., Beck, J.T., Farmer, S.B., Liu, W., Miller, J., Siripun, K.C., Winder, C.T., Schilling, E.E., Small, R.L., 2005. The tortoise and the hare II: relative utility of 21 noncoding chloroplast DNA sequences for phylogenetic analysis. American journal of botany 92, 142-166.

## Sheet: Table S3
Table S3 Species resolution of four markers and all combinations based on different methods
Marker	Tree	Distance	Blast	Blog
atpI-atpH	0	6.94	13.89	14.78
matK	0	6.76	6.76	14.17
psbA-trnH	8.11	13.51	17.57	27.73
ycf1	8.11	14.86	16.22	24.24
atpI-atpH + matK	2.78	6.94	8.33	21.96
atpI-atpH + psbA-trnH	4.17	15.28	19.44	28.35
atpI-atpH + ycf1	6.94	13.89	25	24.61
matK +psbA-trnH	9.46	17.57	22.97	23.5
matK + ycf1	8.11	17.57	22.97	22.32
psbA-trnH + ycf1	9.46	21.62	27.03	35.29
atpI-atpH + matK + psbA-trnH	11.11	16.67	26.39	27.22
atpI-atpH + matK + ycf1	9.72	11.11	27.78	21.78
atpI-atpH + psbA-trnH + ycf1	16.67	19.44	27.78	33.01
matK + psbA-trnH + ycf1	20.27	21.62	27.03	36.23
atpI-atpH + matK + psbA-trnH + ycf1	15.28	20.83	27.78	34.63

## Sheet: Table S4
Table S4 The diagnostic nucleotide of the highest species identification using four cpDNA markers
	atpI-atpH														matK						trnH-psbA															ycf1
Species	Site	2	21	45	165	223	258	336	369	466	595	664	1177			240	296	574	576			32	41	128	142	143	159	177	247	316	341	397	477	551			237	258	318	319	435	472	481	491	523	759
Quercus arbutifolia		G	A	T	G/T	C	G	A	C	C	A	C	G			A	T	G	A			C	C	T	T	T	T	T	C	T	A/C	-	G	C			T	T	T	A	A	C	C	G	G	G
Quercus augustinii		G	A	T	T	C	G	A	C	C	A	C	G/T			A	T	G	A			C	C	T	T	A/T	T	T	C	T	C	-	G	C			T	T	T	A	A	C	C	G	G	G
Quercus bella		G	A	T	T	C	G	A	C	C	A	C	G			A	T	G	A			C	C	T	T	T	T	T	C	T	C	-	G	A/C			T	T	T	A	A	C	C	G	G	G
Quercus blakei		G	A	T	T	C	G	A	C	C	A	C	G			A	T	G	A			C	C	T	T	T	T	T	C	T	C	-	G	C			T	T	T	A	A	C	C	G	G	G
Quercus championii		G/T	A	T	T	C	G	A	C	C	A	C	G			A	T	G	A			C	C	T	T	A/T	T	T	C	T/-	A/C	-	A/G	C			T	T	T	A	A	C	C	G	G	G
Quercus chapensis		G	A	T	T	C	G	A	C	C	A	C	G			A	T	G	A			C	C	T	T	A/C/T	T	T	C	T	C	-	G	C			T	T	T	A	A	C	C	G	G	G
Quercus daimingshanensis		G	A	T	T	C	G	A	C	C	A	C	G			A	T	G	A			C	C	T	T	T	T	T	C	T	C	-	G	C			T	T	T	A	A	C	C	G	G	G
Quercus delavayi		G	A	T	T	C	G	A	C	C	A	C	G			A/C	T	G	A			C	C	T	T	A/C/T	A/T	T	C	T/-	C	-	G	C			T	T	T	A	A	C	C	G	T/G	G
Quercus edithiae		G	A	T	T	C	G	A	C	C	A	C	G			A	T	G	A			C	C	T	T	T	T	T	C	T	C	-	G	C			T	T	T	A	A	C	C	G	G	G
Quercus fleuryi		G	A	T	T	C	G	A	C	C	A	C	G			A	T	G	A			C	C	T	T	T	T	T	C	T	C	-	G	C			T	T	T	A	A	C	C	G	G	G
Quercus gilva		G	A	T	T	C	G	A	C	C	A	A/C	G			A	T	G	A			C	C	T	T	T	T	T	C	A/T	C	-	A/G	C			T	T	T	A	A	C	C	G	G	G
Quercus ciliaris		G	G/A	T	T	C	G	A	C	C	A	C	G			A	T	G	A			C	C	T	T/-	T	T	T/-	A/C	T	A/C	-	G	C			T	T	G/T	A	A	C	C	G	G	G
Quercus kerrii		G	A	T	T	C	G	A	C	C	A	C	G			A	T	G	A			C	C	T	T	A/T	T	T	C	T	C	-	G	C			T	T	T	A	A	C	C	G	G	G
Quercus kouangsiensis		G	A	T	T	C	G	A	C	C	A	C	G			A	T	G	A			C	C	T	T/C	T	T	C/T	C	T/-	C	T/-	G	C			T	T	T	A	A	C	C	G	G	G
Quercus lamellosa		G	A	T	T	C/-	G	A	C	C	A	C	G			A	T	G	A/C			C	C	T	T	A/C	T	T	A/C	T	C	-	A/G	C			A/T	C/T	A/T	A	A/T	C	C	G	G	G
Quercus langbianensis		G	A	T	T	C	G	A	C	C	A/G	C	G			A	C/T	G	A			C	C	T	T	A/T	T	T	C	T	C	-	G	C			T	T	T	A	A	C	C	G	G	G
Quercus morii		G	A	T	T	C	G	A	C	C	A	C	G			A	T	G	A			C	C	T	-	T	T	T/-	C	T	C	-	G	C			T	T	T	A	A	C	C	G	G	G
Quercus hypargyrea		G	A	T	T	C	G	A	C	C	A	C	G			A	T	G	A			C	C	T	T/-	T	T	T/-	C	A/T	A/C	-	G	C			T	C/T	T	A	A	C	C	G	G	G
Quercus myrsinifolia		G	A	T	T	C	G	A	C	C	A	C	G			A	T	G	A			C	C	T	T	T	T	T	C	T	C	-	G	C			T	T	T	A	A	C	C	G	G	G
Quercus oxyodon		G	A	T	T	C/T	A/G	A/G	A/C	C	A	C	G/T			A	T	G	A			C	C	T	T/C	T	T	C/T	C	T	C	-	G	C			T	T	T	A	A/T	C	C	G/T	G	G
Quercus pachyloma		G	A	T	T	C	G	A/G	A/C	C	A	C	G			A	T	G	A			C	C	T	T	T	T	T	C	T	C	-	G	C			T	T	T	A	A	C	C	G	G	G
Quercus patelliformis		G	A	T	T	C	G	A	C	C	A	C	G			A	T	G	A			A/C	C	T	T	T	T	T	C	T	C	-	G	C			T	T	T	A	A	C	C	G	G	G
Quercus rex		G	A	T	T	C	G	A	C	C	A	C	G			A	T	G	A			C	C	T	C	T	A	C	C	T	C	-	G	C			T	T	T	A	A	T	C	G	G	G
Quercus salicina		G	A	T	T	C	G	A	C	C	A	C	G/T			A	T	G	A			T	C	T	T	T	T	T	A	A	A	-	G	C			T	T	G/T	A	A	C	C	G	G	G
Quercus schottkyana		G	A	A/T	T	C	G	A	C	C	A	C	G			A	T	G	A/C			C	C	T	T	T	T	T	C	T	C	-	G	C			T	T	T	A	A	C	C	G	G	G
Quercus sessilifolia		G	A	T	T	C	G	A	C	C	A	C	G			A	T	G	A			C	C	T	C/T/-	T	A/T	C/T/-	C	A/T	A/C	-	G	C			T	T	T	A	A	C	C	G	G	G
Quercus salicina		G	A	T	T	C	G	A	C	C	A	C	G			A	T	G	A			C	C	T	T	T	T	T	C	T	C	-	G	C			T	T	T	A	A	C	C	G	G	G
Quercus stewardiana		G	A	T	T	C	G	A	C	C	A	C	G			A	T	G	A			C	C	T	T/-	T	T	T	C	A/T	A/C	-	G	C			T	T	T	A	A	C	C	G	G	G
Quercus acherdophylla		G	A	T	T	C	G	A	C	C	A	C	G			A	T	G	C			C	C	T	T	A	T	T	C	T	C	-	G	C			T	C	T	A	T	C	-	-	G	G
Quercus acrodonta		G	A	T	T	C	G	A/G	A/C	C	A	C	G			A	T	G	A/C			C	C	T	T	A	T	T	C/T	T	C	-	A/G	C			T	T	C/T	A	A/T	C	C	G	G	G
Quercus acuta		G	A	T	T	C	G	A	C	C	A	C	G			A	T	G	A			C	C	T	T	T	T	T	C	T	C	-	G	C			T	T	T	A	A	C	C	G	G	G
Quercus acutissima		G	A	T	T	C/-	G	G	A	C	A	C	G/T			A	T	G	C			C	C	T	T	A	T	T	T	T	C	T	A	C			T	T	T	A	T	C	C	G	G	G
Quercus agrifolia		G	A	T	T	C	G	A	C	C	A	C	G			A	T	G	C			C	C	T	T	A	T	T	C	T	C	-	G	C			T	C	T	A	T	C	-	-	G	G
Quercus aliena		G	A	T	T	C/-	G	A	C	C	A	C	G			A	T	G	C			T	C	T	T	A	T	T	C	T	C	-	A	C			T	C	T	T	T	C	-	-	G	G
Quercus alnifolia		G	A	T	T	C	G	A	C	C	A	C	G			A	T	G	C			C	C	T	T	A/C	T	T	A/C	T/-	C	-	G	C			T	T	T	A	A/T	C	C/-	G/-	G	C/G
Quercus aquifolioides		G	A	T	T	C	G	A	C	C	A	C	G			A	T	G	C			C	C	T	T	A	T	T	C/-	T	C	A/-	G	C			T	C/T	T	A	A/G	C	C/-	G/-	C/G	G
Quercus arkansana		G	A	T	T	C	G	A	C	C	A	C	G			A	T	G	C			C	C	T	T	A	T	T	C	T	C	-	G	C			T	C	T	A	T	C	-	-	G	G
Quercus baloot		G	A	T	T	C	G	A	C	C	A	C	G			A	T	G	C			C	C	T	T	A	T	T	A/C	T	C	A/-	A/G	C			T	C	T	A	A	C	C	G	G	G
Quercus baronii		G	A	T	T	C	G	A/G	A/C	C	A	C	G			A	T	G	C			C	C	C/T	T	A	T	T	T	T	C	-	A/G	C			A/T	C/T	T	A	A/T	C	C	G	G	G
Quercus bawanglingensis		G	A	T	T	C	G	A/G	C	C	A	C	G			A	T	G	A/C			C	C	T	T	A/C	T	T	C	T/-	C	-	A/G	C			T	T	A/T	A	A	C	-	-	G	G
Quercus infectoria subsp. veneris		G	A	T	T	C	G	A	C	C	A	C	G			A	T	G	C			T	C	T	T	A	T	T	C	T	C	-	A	C			T	C	T	A	T	C	C	G	G	G
Quercus chenii		G	A	T	T	T	G	G	A	C	A	C	G			A	T	G	C			C	C	T	T	A	T	T	T	T	C	T	G	C			T	T	T	A	T	C	C	G	G	G
Quercus chrysolepis		G	A	T	T	C	G	A	C	C	A	C	G			A	T	G	C			C	C	T	T	A	T	T	C	T	C	-	A	C			T	C	T	A	T	C	-	-	T	G
Quercus coccifera		G	A	T	T	C	G	A/G	A/C	C	A	C	G/T			A	T	G	C/T			C	C	T/-	T	A	T	T	C/T	T/-	C	-	A/G	C			T	C/T	T	A	T	C	C	A/G	T	G
Quercus cocciferoides		G	A	T	T	C	G	A/G	C	C	A	C	G			A	T	G	A/C			C	C	T	T	A/C	T	T	C	T/-	C	-	G	C			T	T	T	A	A	C	C	G	G	G
Quercus coccinea		G	A	T	T	C	G	A/G	C	C	A	C	G			A	T	G	C			C	C	T	T	A	T	T	C	T	C	-	G	C			T	C	T	A	T	C	-	-	G	G
Quercus cornelius-mulleri		G	A	T	T	-	G	A	C	C	A	C	G			A	T	G	C			C	C	T	T	A	T	T	C	T	C	-	G	C			T	C	T	A	A	C	-	-	G	G
Quercus dolicholepis		G	A	T	T	C	G	A/G	A/C	C	A	C	G			A	T	G	A/C			C	C	T	T	A/C	T	T	C/T	T/-	C	-	A/G	C			T	T	T	A	A	C	C	G	G	G
Quercus engleriana		G	A	T	T	C	G	G	A	C	A	C	G			A	T	G	C			C	A	T	T	A	T	T	T	T	C	-	A/G	C			T	T	T	A	A	A/C	C	G	G	G
Quercus floribunda		G	A	T	T	C	G	A	C	C	A	C	G			A	T	G	C			C	C	T	T	A	T	T	T	T	C	-	A	C			T	C	T	A	A	C	C	G	G	G
Quercus franchetii		G	A	T	T	C/-	G	A	C	C	A	C	G			A	T	G	A/C			C	C	T	T	A/C/T	T	T	A	T/-	C	-	A/G	C			T	T	T	A	A	C	C	G	G/T	G
Quercus greggii		G	A	T	T	C	G	A	C	C	A	C	G			A	T	G	C			C	C	T	T	A	T	T	C	T	C	-	G	C			T	T	T	A	A	C	C	G	G	G
Quercus ilex		G	A	T	T	C/-	G	A	C	C	A	C	G			A	T	G	C/T			C	C	T/-	T	A	T	T	C	T/-	C	-	G	C			T	C/T	T	A	A/T	C	C	G	G/T	G
Quercus infectoria		G	A	T	T	C	G	A	C	C	A	C	G			A	T	G	C			T	C	T	T	A	T	T	C	T	C	-	A	C			T	C	T	A	T	C	-	-	G	G
Quercus kingiana		G	A	T	T	C	G	A	C	C	A	C	G			A	T	T	A			C	C	T	T	C	T	T	C	-	C	-	G	C			T	T	A/T	A	A	C	C	G	G	G
Quercus leucotrichophora		G	A	T	T	C	G	A/G	C	A/C	A	C	G			A/C	T	G	C			C	C	T	T	A	T	T	A	T	C	-	A	C			T	C	T	A	A	C	C	G	G	G
Quercus longispica		G	A	T	T	C	G	A	C	C	A	C	G			A	T	G	A/C/T			C	C	T	T	A/C	A/T	T	C	T/-	C	-	G	C			T	C/T	T	A	A	C	C	G	G/T	G
Quercus marlipoensis		G	A	T	T	C	G	A/G	C	C	A	C	G			A	T	G	A/C			C	C	T	T	A	T	T	A/C	T	C	-	A/G	C			T	T	T	A	A	C	C	G	G	G
Quercus pannosa		G	A	T	T	C/A	G	A	A/C	C	A	C	G			A	T	G	C			C/A	C	T	T	A	T	T	C	T	C	-	A/G	C			T	C/T	T	A/T	A/G	C	C/T	G	C/G/T	G
Quercus phillyreoides		G	A	T	T	C	G	G	A	C	A	C	G/T			A	T	G	A/C			C	C	T	T	A	T	T	T	T	C	-	A/G	C			T	T	T	A	A/T	C	C	G	G	G
Quercus rehderiana		G	A	T	T	C/T/-	G	A	C	C	A	C	G			A	T	G	C			C	C	T	T	A	T	T	C	T	C	-	A/G	C			T	T	T	A	A	C	C	G	G	G
Quercus rugosa		G	A	T	T	C	A/G	A	C	C	A	C	G			A	T	G	C			C	C	T	T	A	T	T	C	T	C	-	A	C			T	C	T	A	A	C	-	-	G	G
Quercus rubra		G	A	T	T	C	G	A	C	C	A	C	G			A	T	G	C			C	C	T	T	A	T	T	C	T	C	-	G	C			T	C	T	A	T	C	-	-	G	G
Quercus senescens		G	A	T/-	T	C	G	A	C	C	A	C	G/T			A	T	G	A/C			C	C	T	T	A/C	A/T	T	C	T/-	C	-	A	C			T	T	T	A	A	C	C	G	G	G
Quercus serrata		G	A	T	T	C	G	A	C	C	A	C	G			A	T	G	C			T	C	T	T	A	T	T	C	T	C	-	A/G	C			T	C	T	T	T	C	-	-	G	G
Quercus setulosa		G	A	T	T	C	G	A/G	C	C/T	A	C	G			A	T	G	A			C	C	T	T	A	T	T	C	T	C	-	A/G	C			T	T	A/T	A	A/G	C	C	G	G	G
Quercus spinosa		G	A	T	T	C	G	A/G	C	C	A	C	G			A	T	G	A/C			C	C	T	T	A	T	T	T	T	C	-	A/G	C			T	T	A/T	A	A	C	C/-	G/-	G	G
Quercus suber		G	A	T	T	C	G	G	A	C	A	C	G			A	T	G	C			C	C	T	T	A	T	T	C	T	C	-	A	C			T	T	T	A	A	C	C	G	G	G
Quercus tarokoensis		G	A	T	T	C	G	G	C	C	A	C	G			A	T	G	C			C	C	T	T	A	T	T	C	T	C	-	A	C			T	T	A	A	T	C	C	G	G	G
Quercus tatakaensis		-	-	-	-	-	-	-	-	-	-	-	-			A	T	G	C			C	C	T	T	A	T	T	T	T	C	-	A	C			T	T	T	A	T	C	C	G	G	G
Quercus tungmaiensis		-	-	-	-	-	-	-	-	-	-	-	-			A	T	G	C			C	C	T	T	A	T	T	T	T	C	-	A	C			T	C	T	A	A	C	C	G	G	G
Quercus utilis		G	A	T	T	C	G	A/G	A/C	C	A	C	G			A	T	G	A/C			C	A/C	T	T/-	A/T	T	T/-	T	T	A/C	-	A/G	C			T	T	T	A	A/T	A/C	C	G	G	G
Quercus variabilis		G	A	T	T	C	G	A/G	A/C	C	A	C	G			A	T	G	C			C	C	T	T	A	T	T	T	T	C	T	A	C			T	T	T	A	A/T	C	C	G	G	G
Quercus yiwuensis		G	A	T	T	C	G	A	C	C	A	C	G			A	T	G	A/C			C	C	T	T	A/C	A	T	C	T/-	C	-	A	C			A/T	C/T	T	A	A/G	C	C	G	G	G
